# Supplementary material
Source: PubMed Central journal article supplement (PMC3024652)
Supplement: 1017762108_pnas.1017762108_SI.pdf [file 1017762108_pnas.1017762108_SI.pdf]

# Supporting Information

Tian et al. 10.1073/pnas.1017762108

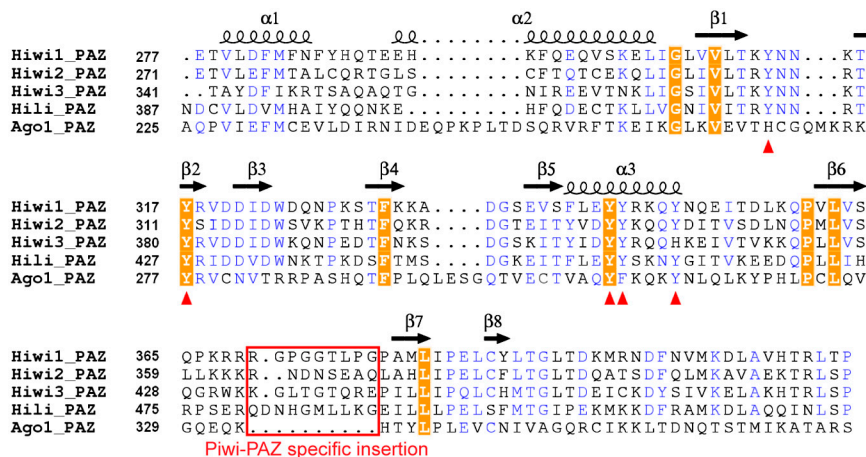

**Fig. S1.** Sequence alignment of human Piwi and Ago PAZ (Piwi/Argonaute/Zwille) domains. Amino acid sequence alignment of PAZ domains from human Piwi family members Hiwi1, Hiwi2, Hiwi3, Hili, and human Ago1. A red box highlights the Piwi PAZ-specific insertion element between strands  $\beta 6$  and  $\beta 7$ . Conserved side chains are shown in an orange background, whereas those lining the binding pocket for the 2-nt segment at the 3' end are indicated by red triangles.

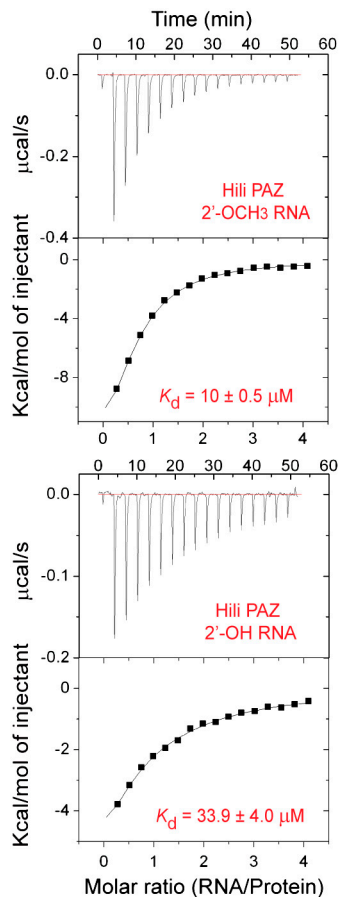

**Fig. S2.** RNA binding analysis on Hili PAZ domain. Isothermal titration calorimetry measurements for binding of Hili PAZ to self-complementary 14-mer RNA containing 2'-OCH<sub>3</sub> (Upper) and 2'-OH (Lower) at the 3' end.

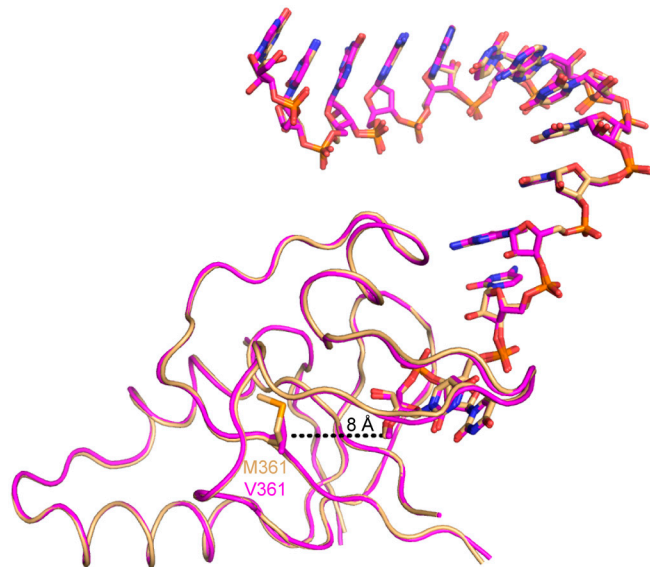

**Fig. S3.** Structural superposition of RNA bound complexes of wild-type and V361M mutant Hiwi1 PAZ domains. Wild-type Hiwi1 and V361M PAZ domains are colored in magenta and biscuit. The side chains of Val361 in wild-type and Met361 in V361M mutant Hiwi1 PAZ are shown in stick representation. The dotted line shows the distance between the methyl group of Um14 and Val361/Met361 of PAZ domain.

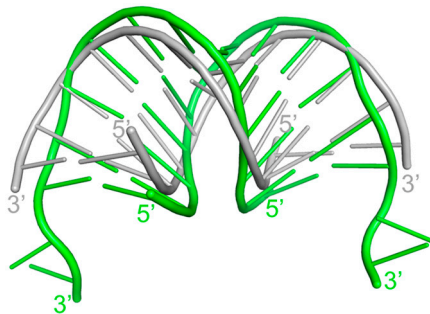

**Fig. S4.** Structural superposition and comparison of double-stranded RNA (dsRNA) observed in Hiwi1 PAZ-RNA complex and ideal A-form helix. The dsRNA in the Hiwi PAZ complex is colored green, whereas the ideal A-form dsRNA is colored in silver.

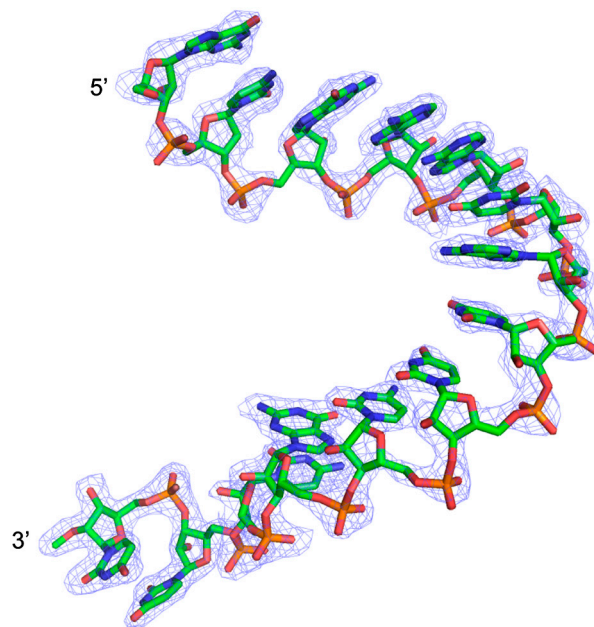

**Fig. S5.** Electron density for the RNA strand in Hiwi1 PAZ-RNA complex. The  $2F_o - F_c$  map (contoured at  $1.2\sigma$ ) corresponding to one strand of the RNA present in the asymmetric unit.

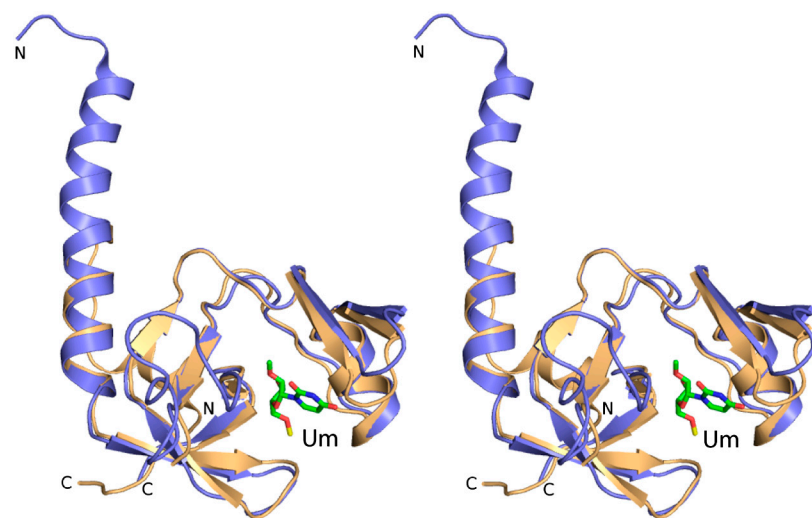

**Fig. S6.** Structural superposition in stereo of Hili PAZ in the free state and Hiwi1 PAZ in their RNA bound states. Comparison of Hili PAZ domain (in blue) and Hiwi1 PAZ domain (in biscuit) with bound 2'-Um (Um stands for the 3'-terminal U modified by a 2'-OCH<sub>3</sub> group) at 3' end (in green)



**Table S1. Crystallographic data collection and refinement statistics**

|                                                     | Hiwi1(V361M)<br>PAZ-RNA complex<br>2'-OCH <sub>3</sub> at 3' end | Hiwi1<br>PAZ-RNA complex<br>2'-OCH <sub>3</sub> at 3' end | Hiwi1<br>PAZ-RNA complex<br>2'-OH at 3' end | Hili PAZ              |
|-----------------------------------------------------|------------------------------------------------------------------|-----------------------------------------------------------|---------------------------------------------|-----------------------|
| <b>Data collection</b>                              |                                                                  |                                                           |                                             |                       |
| Wavelength, Å                                       | 0.9792                                                           | 0.9792                                                    | 0.9792                                      | 0.9792                |
| Space group                                         | P4 <sub>1</sub> 22                                               | P4 <sub>1</sub> 22                                        | P4 <sub>1</sub> 22                          | C222 <sub>1</sub>     |
| Unit cell                                           |                                                                  |                                                           |                                             |                       |
| <i>a, b, c</i> , Å                                  | 44.45, 44.5, 147.2                                               | 44.0, 44.0, 147.0                                         | 44.3, 44.3, 147.7                           | 40.5, 142.9, 226.5    |
| $\alpha, \beta, \gamma$ , °                         | 90, 90, 90                                                       | 90, 90, 90                                                | 90, 90, 90                                  | 90, 90, 90            |
| Resolution, Å                                       | 20.0-2.1 (2.17-2.10)                                             | 30.0-2.9 (3.0-2.9)                                        | 20.0-2.8 (2.9-2.8)                          | 50.0-2.92 (3.02-2.92) |
| Total reflections                                   | 316,709                                                          | 190,815                                                   | 130,613                                     | 214,388               |
| Unique reflections                                  | 9,323                                                            | 3,631                                                     | 4,130                                       | 14,822                |
| <i>I</i> / $\sigma$ <i>I</i>                        | 38.4 (15.0)                                                      | 32.5 (4.8)                                                | 14.8 (1.9)                                  | 20.2 (3.0)            |
| Completeness, %                                     | 99.4 (100.0)                                                     | 95.3 (72.3)                                               | 96.6 (78.7)                                 | 95.1 (67.2)           |
| Redundancy                                          | 11.4 (12.0)                                                      | 10.4 (6.2)                                                | 4.1 (2.8)                                   | 6.9 (4.7)             |
| <i>R</i> <sub>merge</sub>                           | 5.9 (18.0)                                                       | 8.3 (20.9)                                                | 9.6 (36.1)                                  | 9.1 (30.7)            |
| <b>Refinement</b>                                   |                                                                  |                                                           |                                             |                       |
| <i>R</i> <sub>work</sub> / <i>R</i> <sub>free</sub> | 23.5/27.9                                                        | 25.2/30.5                                                 | 24.3/29.7                                   | 24.6/29.3             |
| No. of atoms                                        |                                                                  |                                                           |                                             |                       |
| Protein                                             | 874                                                              | 855                                                       | 871                                         | 3,578                 |
| RNA                                                 | 293                                                              | 293                                                       | 292                                         | 0                     |
| Water                                               | 52                                                               | 6                                                         | 22                                          | 9                     |
| Average B factors, Å <sup>2</sup>                   |                                                                  |                                                           |                                             |                       |
| Protein                                             | 35.6                                                             | 60.2                                                      | 45.5                                        | 75.3                  |
| RNA                                                 | 44.3                                                             | 65.8                                                      | 48.9                                        | —                     |
| Water                                               | 44.8                                                             | 38.9                                                      | 38.4                                        | 61.4                  |
| rmsd                                                |                                                                  |                                                           |                                             |                       |
| Bond lengths, Å                                     | 0.010                                                            | 0.005                                                     | 0.005                                       | 0.005                 |
| Bond angles, °                                      | 1.383                                                            | 0.842                                                     | 0.849                                       | 0.887                 |
| Ramachandran statistics, %                          |                                                                  |                                                           |                                             |                       |
| Mostly allowed regions                              | 94.3                                                             | 94.4                                                      | 94.8                                        | 82.9                  |
| Allowed regions                                     | 5.7                                                              | 5.6                                                       | 5.2                                         | 14.3                  |
| Generously allowed regions                          | 0.0                                                              | 0.0                                                       | 0.0                                         | 2.6                   |
| Disallowed regions                                  | 0.0                                                              | 0.0                                                       | 0.0                                         | 0.3                   |

Values in parentheses are for highest-resolution shell.  $R_{work} = \sum |F_o - F_c| / \sum F_o$ .  $R_{free}$  is the cross-validation of *R* factor.
